# Supplementary material for: Does the Type of Sport Influence Morphology of the Hip? A Systematic Review
Source: PubMed Central journal article supplement — Am J Sports Med. 2021 Aug 24;50(6):1727–41. doi: 10.1177/03635465211023500 (PMC9069562; doi:10.1177/03635465211023500), 2021-08-24
Supplement: sj-pdf-1-ajs-10.1177_03635465211023500.pdf [file sj-pdf-1-ajs-10.1177_03635465211023500.pdf]

**Does the Type of Sport Influence Morphology of the Hip? A Systematic Review**

**Appendix Table A1: Search Strategy**

| EMBASE 1996- : 619 Studies                                 |         | Cochrane: 53 Studies                                                                       |         | PubMed: 781 Studies                                                                                                                                                                                                                                                                                                                                                                                                                                                   |         |
|------------------------------------------------------------|---------|--------------------------------------------------------------------------------------------|---------|-----------------------------------------------------------------------------------------------------------------------------------------------------------------------------------------------------------------------------------------------------------------------------------------------------------------------------------------------------------------------------------------------------------------------------------------------------------------------|---------|
| Strategy                                                   | Studies | Strategy                                                                                   | Studies | Strategy                                                                                                                                                                                                                                                                                                                                                                                                                                                              | Studies |
| 1. exp athlete/                                            | 47364   | 1. MeSH descriptor: [Athletes] in all MeSH products                                        | 857     | (Athletes [mh] OR Sports [mh] OR Adolescent [mh] OR activity [tiab] OR Player* [tiab] OR Sport* [tiab] OR Active [tiab]) AND (Etiology [mh] OR Prevalence [mh] OR Age factors [mh] OR Growth plate [mh] OR athletic injuries [mh] OR Pathology [sh] OR pathophysiology [sh] OR Aetiology [tiab] OR Prevalence [tiab] OR Development [tiab]) AND (Femoroacetabular impingement [mh] OR FAI [tiab] OR Cam deformity [tiab] OR Cam-type [tiab] OR Cam morphology [tiab]) | 783     |
| 2. exp sport/                                              | 134851  | 2. MeSH descriptor: [Sports] explode all trees                                             | 15040   |                                                                                                                                                                                                                                                                                                                                                                                                                                                                       |         |
| 3. exp adolescent/                                         | 1142173 | 3. MeSH descriptor: [Adolescent] explode all trees                                         | 102290  |                                                                                                                                                                                                                                                                                                                                                                                                                                                                       |         |
| 4. Activity.ab,kw,ti.                                      | 2517839 | 4. (Activity):ti,ab,kw                                                                     | 137873  |                                                                                                                                                                                                                                                                                                                                                                                                                                                                       |         |
| 5. Player*.ab,kw,ti.                                       | 66675   | 5. (player*):ti,ab,kw                                                                      | 3079    |                                                                                                                                                                                                                                                                                                                                                                                                                                                                       |         |
| 6. Sport*.ab,kw,ti.                                        | 87274   | 6. (Sport*):ti,ab,kw                                                                       | 8688    |                                                                                                                                                                                                                                                                                                                                                                                                                                                                       |         |
| 7. Active.ab,kw,ti.                                        | 957646  | 7. (Active):ti,ab,kw                                                                       | 90926   |                                                                                                                                                                                                                                                                                                                                                                                                                                                                       |         |
| 8. exp etiology/                                           | 1394923 | 8. Any MeSH descriptor in all MeSH products and with qualifier(s): [etiology - ET]         | 67985   |                                                                                                                                                                                                                                                                                                                                                                                                                                                                       |         |
| 9. exp prevalence/                                         | 697319  | 9. MeSH descriptor: [Prevalence] explode all trees                                         | 4863    |                                                                                                                                                                                                                                                                                                                                                                                                                                                                       |         |
| 10. exp age factors/                                       | 656535  | 10. MeSH descriptor: [Age Factors] explode all trees                                       | 10014   |                                                                                                                                                                                                                                                                                                                                                                                                                                                                       |         |
| 11. exp growth plate/                                      | 1647    | 11. MeSH descriptor: [Growth Plate] explode all trees                                      | 4       |                                                                                                                                                                                                                                                                                                                                                                                                                                                                       |         |
| 12. *pathology/                                            | 84087   | 12. Any MeSH descriptor in all MeSH products and with qualifier(s): [pathology - PA]       | 43200   |                                                                                                                                                                                                                                                                                                                                                                                                                                                                       |         |
| 13. *pathophysiology/                                      | 33598   | 13. Any MeSH descriptor in all MeSH products and with qualifier(s): [physiopathology - PP] | 77240   |                                                                                                                                                                                                                                                                                                                                                                                                                                                                       |         |
| 14. exp athletic injuries/                                 | 21217   | 14. MeSH descriptor: [Athletic Injuries] explode all trees                                 | 656     |                                                                                                                                                                                                                                                                                                                                                                                                                                                                       |         |
| 15. Aetiology.ab,kw,ti.                                    | 53622   | 15. (aetiology):ti,ab,kw                                                                   | 86413   |                                                                                                                                                                                                                                                                                                                                                                                                                                                                       |         |
| 16. Prevalence.ab,kw,ti.                                   | 788133  | 16. (prevalence):ti,ab,kw                                                                  | 37586   |                                                                                                                                                                                                                                                                                                                                                                                                                                                                       |         |
| 17. Development.ab,kw,ti.                                  | 2307629 | 17. (development):ti,ab,kw                                                                 | 78550   |                                                                                                                                                                                                                                                                                                                                                                                                                                                                       |         |
| 18. exp femoroacetabular impingement/                      | 3183    | 18. MeSH descriptor: [Femoroacetabular Impingement] explode all trees                      | 64      |                                                                                                                                                                                                                                                                                                                                                                                                                                                                       |         |
| 19. FAI.ab,kw,ti.                                          | 3261    | 19. (FAI):ti,ab,kw                                                                         | 321     |                                                                                                                                                                                                                                                                                                                                                                                                                                                                       |         |
| 20. Cam deformity.ab,kw,ti.                                | 221     | 20. (cam deformity):ti,ab,kw                                                               | 14      |                                                                                                                                                                                                                                                                                                                                                                                                                                                                       |         |
| 21. Cam-type.ab,kw,ti.                                     | 541     | 21. (cam-type):ti,ab,kw                                                                    | 16      |                                                                                                                                                                                                                                                                                                                                                                                                                                                                       |         |
| 22. Cam morphology.ab,kw,ti.                               | 123     | 22. (cam morphology):ti,ab,kw                                                              | 18      |                                                                                                                                                                                                                                                                                                                                                                                                                                                                       |         |
| 23. 1 or 2 or 3 or 4 or 5 or 6 or 7                        | 4382513 | 23. #1 OR #2 OR #3 OR #4 OR #5 OR #6 OR #7                                                 | 311164  |                                                                                                                                                                                                                                                                                                                                                                                                                                                                       |         |
| 24. 8 or 9 or 10 or 11 or 12 or 13 or 14 or 15 or 16 or 17 | 4901288 | 24. #8 OR #9 OR #10 OR #11 OR #12 OR #13 OR #14 OR #15 OR #16 OR #17                       | 286971  |                                                                                                                                                                                                                                                                                                                                                                                                                                                                       |         |
| 25. 18 or 19 or 20 or 21 or 22                             | 5102    | 25. #18 OR #19 OR #20 OR #21 OR #22                                                        | 370     |                                                                                                                                                                                                                                                                                                                                                                                                                                                                       |         |
| 26. 23 and 24 and 25                                       | 619     | 26. #23 AND #24 AND #25                                                                    | 53      |                                                                                                                                                                                                                                                                                                                                                                                                                                                                       |         |
